# Supplementary material
Source: PubMed Central journal article supplement (PMC3352986)
Supplement: NIHMS351554-supplement-01.pdf [file NIHMS351554-supplement-01.pdf]

# Supplementary Figure 1

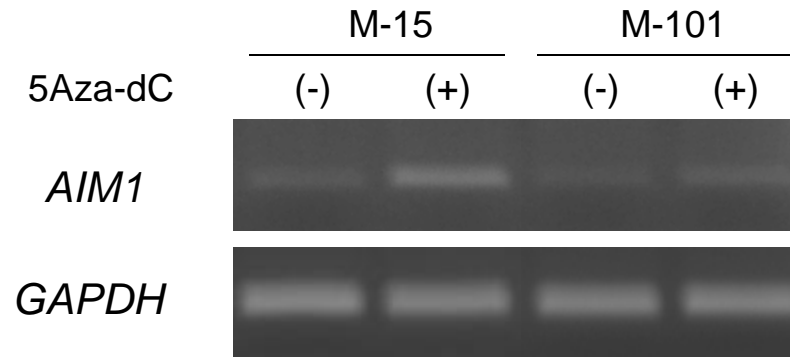



# Supplementary Figure 3

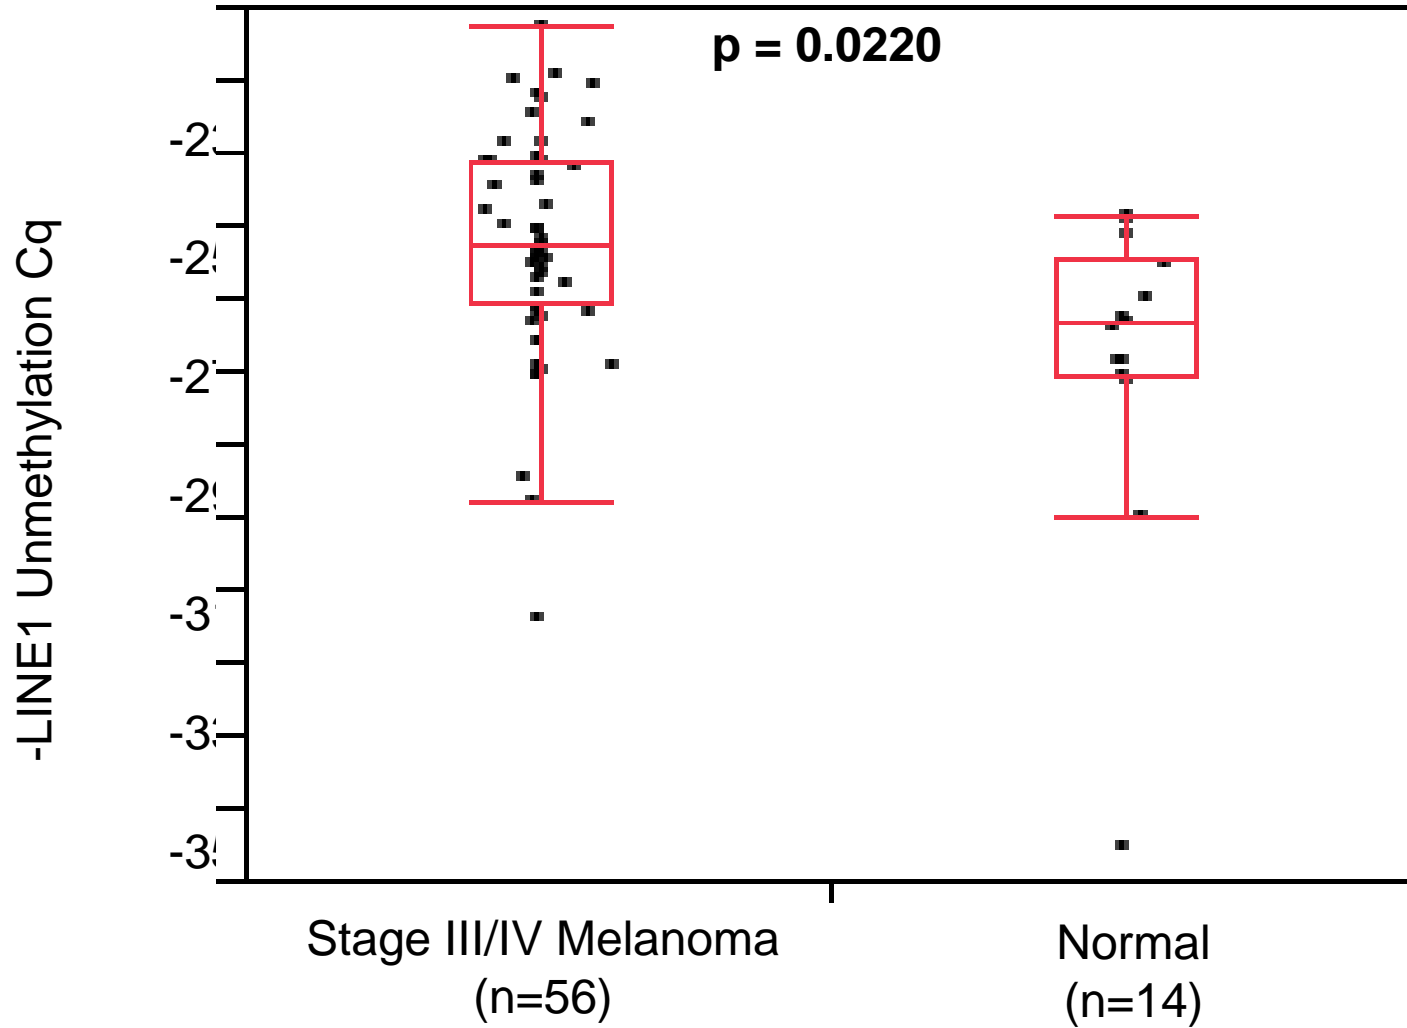

# Supplementary Figure 4

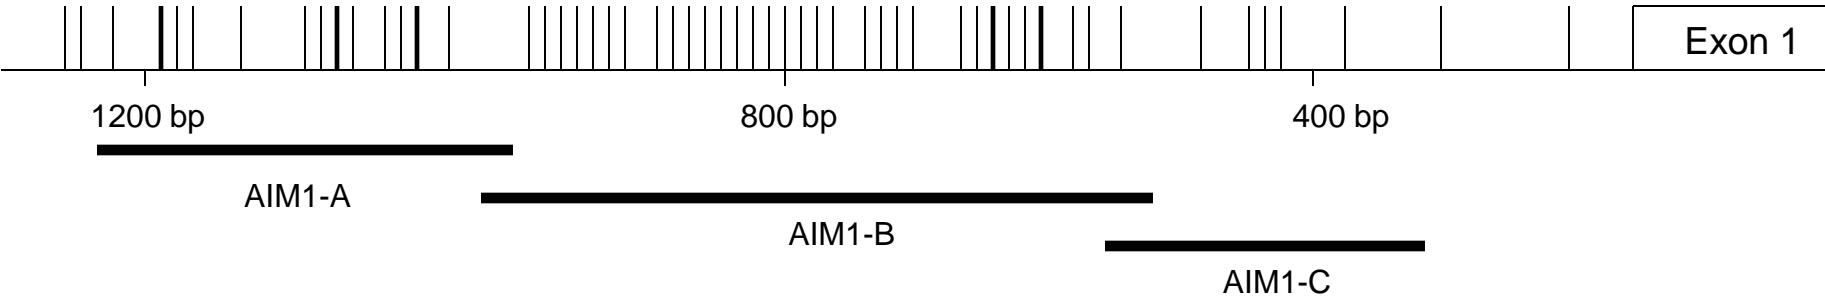

| Primer | Forward Primer              | Reverse Primer               | PCR product (bp) | Covered CpG |
|--------|-----------------------------|------------------------------|------------------|-------------|
| AIM1-A | TTGGTTTGGTTTTAGAGGAGTT      | AAAAAAAAACCTAAACTTCTTATATCTC | 292              | 13          |
| AIM1-B | TGTTTTAGGAGATATAAGAAGTTTAGG | CTCCAAAACAATAAAAAACCAC       | 484              | 34          |
| AIM1-C | ATGTTGAATTTAGGTGGTTTTTTA    | AAAATAAATAATTCCTTACCCTCTCT   | 240              | 4           |

## SUPPLEMENTARY FIGURE LEGENDS

**Supplementary Figure 1.** Expression patterns of *AIM1* mRNA in melanoma cell lines, M-15 and M101, treated with 5Aza-dC. (-) is control medium treated only, (+) 5Aza-dC treated.

**Supplementary Figure 2.** *AIM1* mRNA expression in melanoma tissues. Stage I primaries are unmethylated for *AIM1* while the stage IV metastases have high *AIM1* hypermethylation.

**Supplementary Figure 3.** Unmethylated LINE-1 circulating DNA in serum of normal healthy donor and melanoma patients.

**Supplementary Figure 4.** Schematic representation of *AIM1* promoter region showing CpG sites(vertical lines) and three bisulfite converted amplicons for MALDI-TOF MS (*AIM1*-A, B, C). The lower **Table** shows primer sequences.
